# Supplementary material
Source: ML conference proceedings conference paper supplement (https://openreview.net/forum?id=wcbrhPnOei)
Supplement: supplementary_material [file attachment]

# RobotKeyframing: Learning Locomotion with High-Level Objectives via Mixture of Dense and Sparse Rewards

Anonymous Author(s)

Affiliation

Address

email

**Abstract:** This paper presents a novel learning-based control framework that uses keyframing to incorporate high-level objectives in natural locomotion for legged robots. These high-level objectives are specified as a variable number of partial or complete pose targets that are spaced arbitrarily in time. Our proposed framework utilizes a multi-critic reinforcement learning algorithm to effectively handle the mixture of dense and sparse rewards. Additionally, it employs a transformer-based encoder to accommodate a variable number of input targets, each associated with specific time-to-arrivals. Throughout simulation and hardware experiments, we demonstrate that our framework can effectively satisfy the target keyframe sequence at the required times. The experiments also show that the multi-critic method significantly reduces the effort for hyperparameter tuning compared to the standard single-critic alternative. Moreover, the proposed transformer-based architecture enables robots to anticipate future goals, which results in quantitative improvements in their ability to reach their targets.

**Keywords:** Legged Robots, Multi-Critic Reinforcement Learning, Motion Imitation

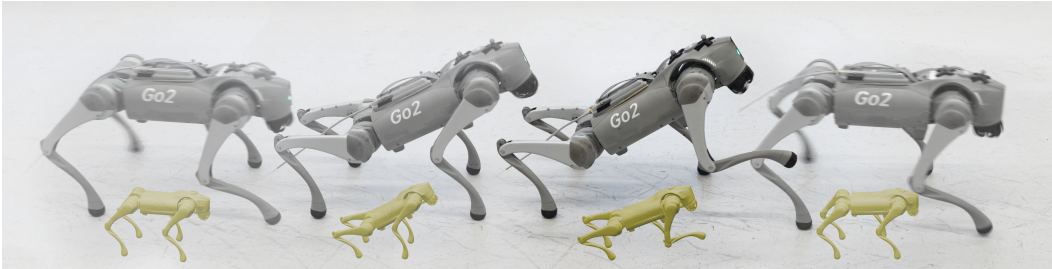

Figure 1: *RobotKeyframing*: Locomotion policy trained with our framework meets the keyframes with position and full posture targets (yellow) at specified times on hardware experiments.

## 1 Introduction

Legged robots hold a significant promise for becoming household companions or automated performers in the entertainment industry [1, 2, 3]. In these applications, it is crucial for robot controllers to perform natural and directable behavior from simple high-level user command inputs beyond the common commands used in the robotic domain such as joystick velocity commands [4, 5] or target base position [6, 7].

In the character animation domain, a widely used technique for specifying character behavior from simple and sparse inputs is *keyframing* [8, 9]. It involves defining the target position or kinematic

pose of the character at particular points in time, allowing animators to create smooth movements by interpolating between these keyframes. Despite its proven effectiveness within the kinematic animation pipeline, incorporating keyframing for achieving time-specific targets remains unexplored in the realm of physics-based robot control.

Inspired by character animation, we aim to equip legged robots with more refined control by incorporating sparse and temporal high-level objectives as keyframes. The primary goal of this work is to develop a locomotion controller that enables the robot to fulfill specified partial or full-pose targets while infilling natural behavior during the intermediate periods. This goal aligns with recent advancements in using reinforcement learning (RL) for legged robots due to their promising robustness and flexibility [10, 11]. However, learning a policy that accurately meets keyframes without imposing undesired constraints at intermediate periods presents challenges, particularly due to the need to handle sparsity in the keyframe objectives. Acquiring effective policies requires a meticulous reward design procedure that carefully balances these sparse rewards with other dense rewards which are crucial for regularizing and encouraging natural motion.

In this work, we present a novel framework that unifies timed high-level objectives with natural locomotion of legged robots through temporal keyframes. Along with the imitation objective similar to Peng et al. [12] for natural motion generation, our pipeline allows specifying full or partial high-level targets, including base position, orientation, and joint postures. We propose using a multi-critic RL framework to address the challenge of managing groups of sparse and dense rewards by learning distinct value functions. Our method also employs a novel transformer-based architecture to encode a variable number of goals with arbitrary time intervals. Unlike typical sequence-to-sequence transformers [13], we propose a lightweight sequence-to-token module that can be used autoregressively within a feedback control loop. We demonstrate the effectiveness of our framework through experiments both in simulation and on real-world hardware. Our policies successfully guides the robot to meet multiple keyframes at the required times, for both position and posture targets. Furthermore, the multi-critic approach showcases better convergence with less hyperparameter tuning compared to the conventional single-critic method. Our experiments also reveals that using a transformer-based encoder to anticipate future goals significantly enhances goal-reaching accuracy.

The contribution of this paper is threefold: (i) We introduce *RobotKeyframing*, a novel learning-based framework for integrating high-level objectives in natural locomotion of legged robots; (ii) We propose using multi-critic RL to handle the mixture of dense and sparse rewards and a novel sequence-to-token encoder to accommodate a variable number of keyframes; (iii) We validate the effectiveness of our method through extensive experiments in simulation and on hardware.

## 2 Related Work

### 2.1 Reinforcement Learning for Legged Robots

Over the last decade, reinforcement learning has been increasingly applied to develop locomotion policies for legged robots [4, 14, 15]. The primary focus has been to achieve robust control policies that can accurately track velocity commands from joysticks [11, 16, 17]. More recently, researchers have attempted to enhance the versatility of legged robot controllers by incorporating high-level objectives, particularly through position- or orientation-based targets [18, 19, 20]. This high-level control is typically accomplished through hierarchical frameworks, where a high-level policy is learned to drive a low-level controller [7, 21, 22]. Conversely, end-to-end approaches aim to develop a unified policy for both high- and low-level control, allowing high-level objectives to directly influence low-level decisions [6, 18, 23]. However, the aforementioned methods typically urge the robot to reach a target as fast as possible, lacking refined control over the temporal profile of achieving the target. Inspired by keyframing in animation, this work aims to further expand control over robot motion by incorporating multiple keyframes as input to the control policy, thereby enabling robots to generate diverse behaviors in reaching targets. We further enhance this versatility by allowing partial or full targets, including base position, orientation, and joint postures.

## 74 2.2 Natural Motion for Characters and Robots

75 Synthesizing naturalistic behavior from existing motion datasets while fulfilling spatial or temporal  
 76 conditions has been extensively studied in the character animation domain [24, 25, 26, 27]. Existing  
 77 research for generating natural motions between keyframes [28, 29, 30] has mainly focused on the  
 78 kinematic properties of characters and thus cannot be directly applied to physics-based characters  
 79 or robots, whose dynamic interactions with the environment require consideration of both kinemat-  
 80 ics and dynamics. Various efforts have also been made to combine kinematic motion generation  
 81 with physically controlled robots to achieve natural behavior on hardware [31, 32, 33, 34]. Another  
 82 thread of research focuses on controlling characters in physically simulated environments, incorpo-  
 83 rating motion datasets as demonstrations [35, 36, 37, 38]. Some of these methods have also been  
 84 successfully transferred to robot control for quadrupeds or humanoids [39, 40, 41, 42]. Among  
 85 these works, Adversarial Motion Priors (AMP) [12] provides a flexible way to encourage the pol-  
 86 icy to have natural, expert-like behavior by connecting generative adversarial networks (GAN) [43]  
 87 with RL given an offline motion dataset. We also incorporate an AMP-based imitation objective to  
 88 encourage naturalistic motion for the policy and further extend it to infilling keyframes for robots.

## 89 3 Method

### 90 3.1 Problem Setup

91 To integrate high-level control objectives into the robotic control framework, we employ sparse  
 92 keyframes that require a robot to achieve specific goals at predetermined times. Each keyframe con-  
 93 tains a full or partial combination of a variety of targets such as global base position  $\hat{\mathbf{p}} \in \mathbb{R}^3$ , global  
 94 base orientation  $(\hat{\phi}, \hat{\zeta}, \hat{\psi}) \in \mathbb{R}^3$  where  $\phi, \zeta, \psi$  denote roll, pitch, and yaw angles respectively, and  
 95 full posture specified by joint angles  $\hat{\boldsymbol{\theta}}_j \in \mathbb{R}^{N_j}$  where  $N_j$  is the number of joints. Each keyframe is  
 96 also assigned with a specific time  $\hat{t} \in \mathbb{R}$  in the future at which the robot is expected to meet the goals.  
 97 In summary, the high-level objectives are specified through these keyframes  $\mathbf{K} = (\mathbf{k}^1, \mathbf{k}^2, \dots, \mathbf{k}^{n_k})$ ,  
 98 where  $\mathbf{k}^i = (\hat{\mathbf{g}}, \hat{t})^i$  and  $\hat{\mathbf{g}} \subset \{\hat{\mathbf{p}}, \hat{\phi}, \hat{\zeta}, \hat{\psi}, \hat{\boldsymbol{\theta}}_j\}$ . Here,  $n_k \leq N_k$  where  $n_k$  and  $N_k$  denote the ac-  
 99 tual and the maximal number of keyframes, respectively. We aim to support an arbitrary number of  
 100 keyframes, allowing for the flexible specification of high-level objectives only as needed.

101 The main goal is to train a locomotion policy for legged robots that not only meets these keyframes  
 102 but also maintains a natural style in the intervals between them. To avoid undesired restrictions on  
 103 the intermediate periods, policy’s task performance is evaluated exclusively at the designated times,  
 104 making the keyframe objectives temporally sparse. However, relying solely on keyframes to train  
 105 the control policy may result in undesirable motions. Thus, it is crucial to have additional rewards  
 106 for regularizing and promoting a natural motion style. In this regard, we incorporate AMP [12] as  
 107 a general style guide for the robot, encouraging the policy to behave naturally and similarly to an  
 108 offline motion dataset from real animals [44]. The style and regularization rewards are evaluated at  
 109 every step of the episode, making them temporally dense. The mixture of sparse and dense rewards  
 110 presents a unique challenge that is difficult to manage effectively with standard RL frameworks.  
 111 Further details on the observation, action, reward definitions, and training procedure can be found  
 112 in Appendix A.

### 113 3.2 Multi-Critic RL for Dense-Sparse Reward Mixture

114 Modern RL algorithms [45, 46, 47] typically employ the actor-critic paradigm, where the actor  
 115 decides the action to take, and the critic evaluates the action by estimating the value function. To  
 116 effectively manage a complex mixture of temporally dense and sparse rewards, we employ a multi-  
 117 critic (MuC) RL framework by Martinez-Piazuelo et al. [48] as shown in Fig. 2. It involves training  
 118 a set of critic networks  $\{V_{\phi_i}\}_{i=0}^n$  to learn distinct value functions associated with different reward  
 119 groups  $\{r_i\}_{i=0}^n$ . Similar concepts have been used to balance a set of dense rewards [49, 50]; however,  
 120 we aim to adapt the multi-critic method to the context of dense and sparse reward combination.

121 We design each reward group to contain either exclusively dense or sparse rewards. This division  
 122 is essential for effectively managing the distinct temporal characteristics of each reward type and  
 123 facilitates value estimation.

124 We integrate the multi-critic concept to Proximal Policy Optimization (PPO) [46], as shown  
 125 in Alg. 1. Particularly, each value network  $V_{\phi_i}(\cdot)$  is trained independently for a specific reward  
 126 group  $r_i$  with temporal difference loss,

$$L(\phi_i) = \hat{\mathbb{E}}_t \left[ \|r_{i,t} + \gamma V_{\phi_i}(s_{t+1}) - V_{\phi_i}(s_t)\|^2 \right], \quad (1)$$

127 where  $\hat{\mathbb{E}}_t$  is the empirical average and  $\gamma$  is the discount factor. The value functions calculated by each  
 128 critic are used to individually estimate the advantage  $\{\hat{A}_i\}_{i=0}^n$  for each reward group. Subsequently,  
 129 these advantages are synthesized into a policy improvement step by calculating the multi-critic ad-  
 130 vantage as a weighted sum of the normalized advantages from each reward group

$$\hat{A}_{MuC} = \sum_{i=0}^n w_i \cdot \frac{\hat{A}_i - \mu_{\hat{A}_i}}{\sigma_{\hat{A}_i}}, \quad (2)$$

131 where  $\mu_{\hat{A}_i}$  and  $\sigma_{\hat{A}_i}$  are the batch mean and standard deviation of the advantage from group  $i$ . Similar  
 132 to PPO, the surrogate loss for policy gradient is clipped

$$L^{CLIP-MuC}(\theta) = \hat{\mathbb{E}}_t \left[ \min \left( \alpha_t(\theta) \hat{A}_{MuC,t}, \text{clip}(\alpha_t(\theta), 1 - \epsilon, 1 + \epsilon) \hat{A}_{MuC,t} \right) \right], \quad (3)$$

133 where  $\alpha_t(\theta)$  and  $\epsilon$  respectively denote the probability ratio and the clipping hyperparameter. This  
 134 formulation integrates feedback from both dense and sparse rewards into the policy update, facili-  
 135 tating a balanced and effective learning process.

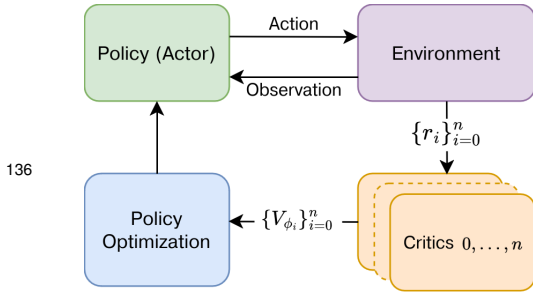

Figure 2: Multi-Critic RL.

---

#### Algorithm 1 Multi-Critic PPO

---

- 1: Initialize policy parameters  $\theta$  and parameters of each critic,  $\phi_i$ .
  - 2: **for**  $n = 1$  to  $N$  **do**
  - 3:   Rollout policy  $\pi_\theta$  to fill the buffer.
  - 4:   **for** each mini-batch **do**
  - 5:     Estimate  $\hat{A}_i$  for each  $r_i$ .
  - 6:     Compute  $\hat{A}_{MuC}$  with Eq. 2.
  - 7:     Update policy with Eq. 3.
  - 8:     Update each critic with Eq. 1.
  - 9:   **end for**
  - 10: **end for**
- 

137 Assigning distinct critics for dense and sparse rewards helps achieve each set of objectives more ef-  
 138 fectively while reducing the reliance on extensive hyperparameter tuning. To illustrate this, consider  
 139 a simple scenario with an episode length of  $T$  involving two types of rewards: a temporally dense  
 140 reward  $r_d$  that is active at every step and a temporally sparse reward  $r_s$  that is only active at the final  
 141 step of an episode

$$r_{s,t} = \begin{cases} \hat{r}_s, & t = T \\ 0, & \text{otherwise.} \end{cases} \quad (4)$$

142 In the conventional single-critic RL, the total reward of each time step  $t$  is typically computed as a  
 143 linear combination of different reward terms  $r_t = w_s r_{s,t} + w_d r_{d,t}$ . The value in this scenario is

$$V(s_t) = \mathbb{E} \left[ w_s \gamma^{(T-t)} \hat{r}_s + w_d \sum_{k=t}^T \gamma^k r_{d,k} \right]. \quad (5)$$

144 We define the reward sparsity ratio as the number of dense reward steps per sparse reward horizon,  
 145 which is here equal to  $T$ . The second term in Eq. 5 consists of a summation over  $T - t$  individual  
 146 reward terms, whereas the first term includes only a single component. This highlights the impact of



different reward sparsities on the learning process, suggesting that the weight of reward groups must be adjusted for different sparsity ratios to achieve a proper balance. This challenge is amplified when the sparsity ratio changes between episodes, for example, when keyframe timings are randomly sampled within a range. These variations can complicate the hyperparameter tuning process and hinder the efficacy of the learning algorithm.

In the multi-critic approach, on the other hand, the advantage for each reward group is normalized independently, ensuring that a fixed weight ratio for the advantages is adequate to maintain the desired balance, regardless of variations in the sparsity ratio. This method decouples reward frequency and magnitude from the learning process, enabling more effective policy optimization and reducing the effort for manual hyperparameter tuning.

### 3.3 Transformer-based Keyframe Encoding

The transformer framework [51] has achieved great success in modeling sequential data not only in the natural language processing [52, 53] but also in other areas including robotics [54]. The attention mechanism, serving as the core of transformer networks, models the correlation between each element of the input sequence and reweights them accordingly. To handle a variable number of keyframes in our problem, we utilize a transformer-based encoder to process the sequence of goals for both the policy and critics. However, unlike the typical application of transformers in sequence-to-sequence tasks, we adapt the architecture to function in a sequence-to-token manner, as shown in Fig. 3. This adaptation makes it suitable for autoregressive feedback control in robotic systems.

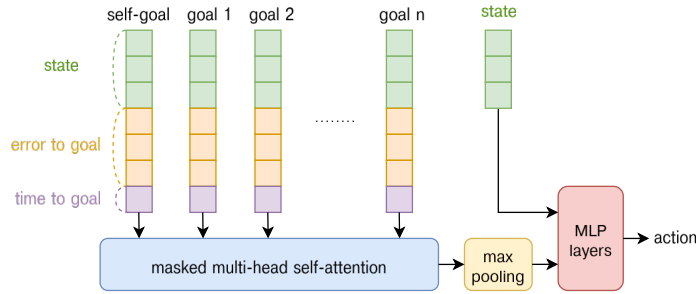

Figure 3: Policy with transformer-based keyframe encoder.

In our system, each input token corresponds to a particular keyframe. At every time step  $t$ , each keyframe  $k^i$  is transformed spatially and temporally into a robot-centric view, resulting in a goal error  $\Delta g_t^i$  and a calculated time to goal  $\hat{t}^i - t$ . These are then concatenated with the robot state  $s_t$  to form a single token. Additionally, we incorporate a *self-goal* keyframe,  $x_t^0$ , as the first token in the sequence. This token represents a state with zero error and zero time to goal, which ensures that the control system remains operational despite the absence of active goals or after achieving all goals. The transformer encoder receives the sequence of tokens  $X_t = (x_t^0, \dots, x_t^{n_k})$ , where  $x_t^0 = (s_t, \mathbf{0}, 0)$ , and  $x_t^i = (s_t, \Delta g_t^i, \hat{t}^i - t)$  for  $i = 1, \dots, n_k$ .

In scenarios where the number of active keyframes is less than the maximum capacity of the system, we apply masking to ignore the surplus tokens and focus only on the relevant keyframes. Furthermore, we also apply masking to keyframes once their designated time is reached and surpassed by a few steps. This practice prevents past goals from inappropriately influencing the long-term behavior of the policy. The output from the transformer encoder is then forwarded to a max-pooling layer, which condenses the encoded goal features for delivery to the subsequent multilayer perceptrons (MLP). By leveraging transformer’s ability to handle sequences of varying lengths, our architecture can effectively integrate multiple and arbitrary numbers of goals into the control process.

## 4 Results

The control policies are trained for quadruped robots with 12 degrees of freedom (DoF) using Isaac Gym [55]. At the start of each episode, the robot is either set to a default state or initialized according

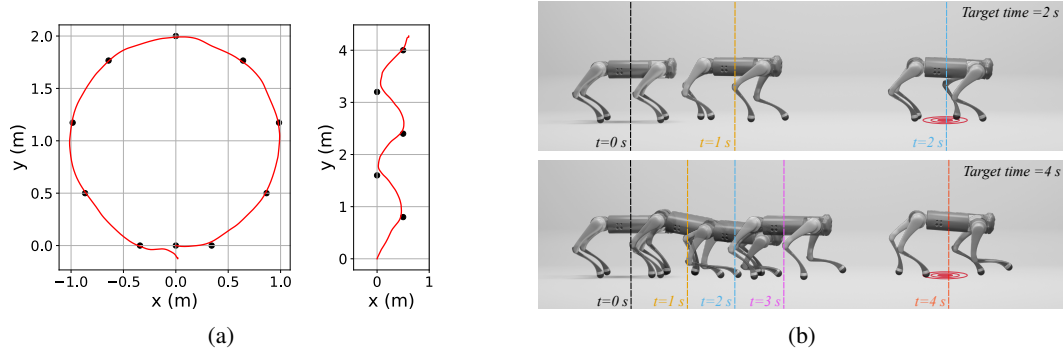

Figure 4: **a)** Horizontal trajectories of the robot base given two sets of position goals (dots). **b)** Specifying different temporal profiles generates diverse behaviors for the same position goal.

185 to a posture and height sampled from the dataset, a technique known as Reference State Initialization  
 186 (RSI) [56]. We incorporate a learning curriculum, beginning with keyframes entirely sourced from  
 187 reference data and progressively increasing the proportion of randomly generated keyframes, with  
 188 time intervals, position targets, and yaw angles each sampled from a predetermined range. In this  
 189 section, we present the qualitative and quantitative experiment results in simulation and on hardware.

#### 190 4.1 Keyframe Tracking

191 We demonstrate that our trained policy effectively reaches keyframes at the designated times through  
 192 several simulation experiments. Given keyframes consisting of position goals, our policy reaches its  
 193 targets with notable precision, as illustrated in Fig. 4a by the horizontal trajectories for two example  
 194 scenarios with different number of keyframes. Furthermore, our framework offers control over  
 195 target reaching time and can generate diverse behaviors for the same targets by specifying different  
 196 time profiles. This is depicted in Fig. 4b through snapshots of robot motion when provided with  
 197 keyframes consisting of the same position goal, but different target times. Full posture targets are  
 198 also supported along with position and orientation goals. Fig. 5 shows snapshots of the robot motion  
 199 given different keyframe scenarios, highlighting that our policy accurately meets its full posture  
 200 targets and maintains a natural style while reaching them.

#### 201 4.2 Multi-Critic RL

202 In this section, we conduct a comparative analysis between multi-critic and single-critic approaches  
 203 in the keyframing setup. Learning curves for both methods are presented in Fig. 6, with each method  
 204 trained across three different ranges of sparsity ratios by sampling keyframes with varying time

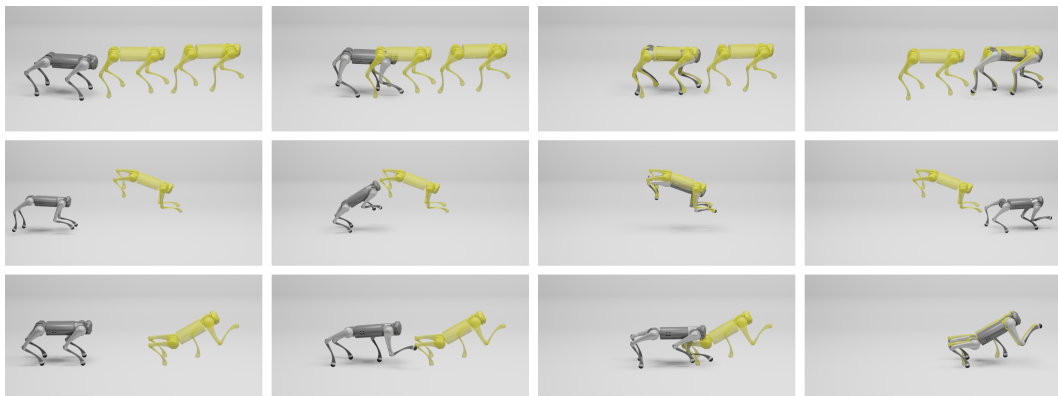

Figure 5: Snapshots of the robot motion given keyframes with full postures: moving forward (**top**), jumping (**middle**) and raising the paw up (**bottom**). Target keyframes are displayed in yellow.

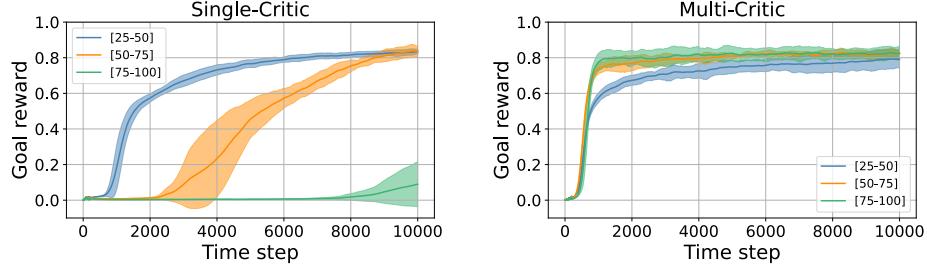

Figure 6: Convergence comparison of single-critic (**left**) and multi-critic (**right**) for different ranges of keyframe time horizons ( $[25, 50]$ ,  $[50, 75]$ ,  $[75, 100]$ ) with fixed weights.

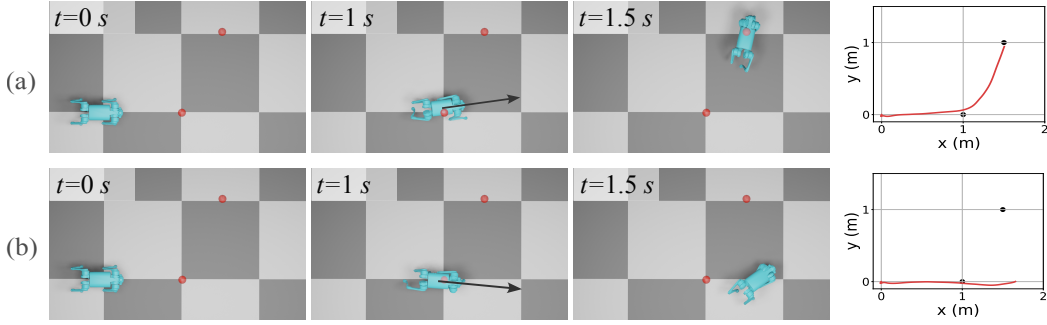

Figure 7: The policy aware of all goals (**a**) adjusts its yaw angle earlier to better reach the second goal compared to the policy only aware of the next goal (**b**). Keyframes are placed at 1 and 1.5 seconds in time. Left: snapshots, right: trajectories.

horizons. Initially, reward and advantage weights are tuned separately for single- and multi-critic according to the time horizon range  $[25, 50]$ . New policies are then trained using the same weights for another two scenarios of time horizons,  $[50, 75]$  and  $[75, 100]$ . The learning curves reveal that the multi-critic algorithm achieves a similarly fast convergence without retuning the advantage weights for different scenarios. In contrast, the single-critic method displays significant delays in reward increase due to the sparser nature with longer keyframe horizons, underscoring the efficiency of the multi-critic in reducing the need for extensive manual hyperparameter tuning. This feature makes multi-critic particularly valuable in environments with varying reward sparsities.

### 4.3 Future Goal Anticipation

An advantage of using a transformer-based encoder is that it enables the policy to incorporate multiple and a varying number of goals as input. If the goals are temporally close to each other, awareness of future goals influences the robot’s motion to achieve all of them more accurately. The phenomenon of future goal anticipation is demonstrated in Fig. 7 where we compare a policy aware of all goals and a policy only aware of the immediate next goal, both trained with only position goals in the keyframe. The policy trained with multiple keyframes adopts a larger yaw angle at the first goal, leaning more towards the second one to be able to reach it with higher accuracy. Table 1 provides a quantitative comparison of the two policies across three different scenarios: straight, turn and slow turn, the latter featuring a longer time horizon for the second goal. The results indicate that future goal anticipation helps the policy to adjust its motion while approaching earlier goals to gain better accuracy for the subsequent targets. This is particularly important when keyframes are temporally close, resulting in higher accuracy gains in fast and dynamic movements, compared to slower ones.

### 4.4 Hardware Deployment

We validate our method through extensive hardware experiments using the Unitree Go2 [57], a 12-DoF commercial quadruped robot. Fig. 8 illustrates the outcomes of a policy that manages up

| First Goal         | Straight                              | Turn                                  | Turn (Slow)                           |
|--------------------|---------------------------------------|---------------------------------------|---------------------------------------|
| Aware of all goals | <b>0.0872 <math>\pm</math> 0.0336</b> | <b>0.0781 <math>\pm</math> 0.0236</b> | 0.0806 $\pm$ 0.0265                   |
| Aware of next goal | 0.0898 $\pm$ 0.0317                   | 0.0841 $\pm$ 0.0335                   | <b>0.0787 <math>\pm</math> 0.0208</b> |
| Second Goal        | Straight                              | Turn                                  | Turn (Slow)                           |
| Aware of all goals | <b>0.0472 <math>\pm</math> 0.0187</b> | <b>0.3340 <math>\pm</math> 0.1162</b> | <b>0.0566 <math>\pm</math> 0.0804</b> |
| Aware of next goal | 0.1332 $\pm$ 0.0605                   | 0.7271 $\pm$ 0.1528                   | 0.1711 $\pm$ 0.1071                   |

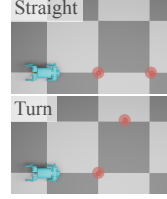

Table 1: Average position error (m) for three keyframe scenarios (depicted on right) across 20 experiments. The policy aware of all goals achieves better accuracy in reaching them.

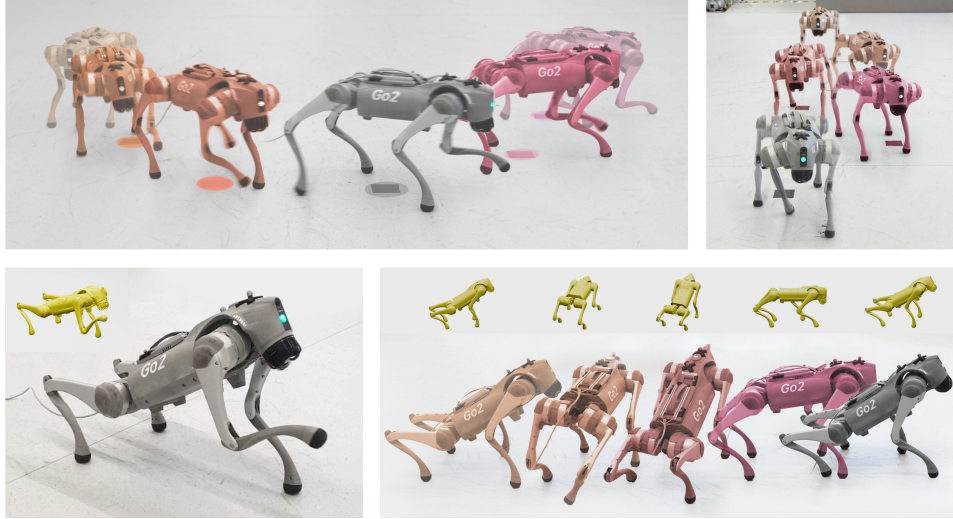

Figure 8: Hardware deployment of *RobotKeyframing* for position targets (**top**), and full-pose targets (**bottom**). Posture keyframes are displayed in yellow.

to 5 positional goals arranged in different courses, and a policy trained for full pose targets that successfully drives the robot to achieve various posture keyframes. These experiments underscore the adaptability and effectiveness of our keyframing approach in enhancing high-level control in robotic systems. Readers are encouraged to watch the videos provided in the supplementary material for a more comprehensive presentation of these results.

## 5 Discussion

**Conclusion:** This paper presents *RobotKeyframing*, a learning-based control framework designed to incorporate high-level objectives into the natural locomotion of legged robots through a sequence of keyframes. Simulation and hardware experiments demonstrate the efficacy of our framework. The sparse reward imposed by keyframe objectives is effectively handled by a multi-critic PPO algorithm. In addition, the transformer-based architecture is adaptive to an arbitrary number of target keyframes and improves accuracy in reaching targets through future goal anticipation.

**Limitations and future work:** First, if the timing values are infeasible for the specified goals, the robot may fail to meet the targets. However, it is worth noting that such cases do not result in uncontrolled behaviors, such as falling down. Second, our approach inherits the mode collapse issue from the AMP framework [12], which can be mitigated in future research through the integration of style embeddings. Third, the performance of our policy is currently limited by the motions in the dataset, restricting its ability to generalize to out of distribution motions or targets. Looking ahead, our method can be expanded to incorporate diverse types of goals in the keyframes, such as end-effector targets or more intuitive high-level inputs such as skill or text. Additionally, *RobotKeyframing* can be extended to more complex characters and potentially used for physics-based motion in-betweening in the character animation domain.

## References

- [1] M. Hopkins, G. Wiedebach, K. Cesare, J. Bishop, E. Knoop, and M. Bächer. Interactive design of stylized walking gaits for robotic characters. *ACM Transactions on Graphics (ToG)*, 2024. URL <https://la.disneyresearch.com/publication/interactive-design-of-stylized-walking-gaits-for-robotic-characters/>.
- [2] Sony Electronics. Aibo companion robot. <https://electronics.sony.com/t/aibo>.
- [3] Walt Disney Imagineering. A new approach to disney’s robotic character pipeline. <https://youtu.be/-cfIm06tcfA?si=G1y14ZTBdlYE8ZtP>, 2023.
- [4] J. Lee, J. Hwangbo, L. Wellhausen, V. Koltun, and M. Hutter. Learning quadrupedal locomotion over challenging terrain. *Science Robotics*, 5(47):eabc5986, 2020. doi:10.1126/scirobotics.abc5986.
- [5] T. Miki, J. Lee, J. Hwangbo, L. Wellhausen, V. Koltun, and M. Hutter. Learning robust perceptive locomotion for quadrupedal robots in the wild. *Science Robotics*, 7(62):eabk2822, 2022.
- [6] N. Rudin, D. Hoeller, M. Bjelonic, and M. Hutter. Advanced skills by learning locomotion and local navigation end-to-end. In *2022 IEEE/RSJ International Conference on Intelligent Robots and Systems (IROS)*, pages 2497–2503. IEEE, 2022.
- [7] D. Hoeller, N. Rudin, D. Sako, and M. Hutter. Anymal parkour: Learning agile navigation for quadrupedal robots. *Science Robotics*, 9(88):eadi7566, 2024.
- [8] D. Sturman. Interactive key frame animation of 3-d articulated models. In *Graphics Interface*, volume 86, 1984.
- [9] F. Thomas and O. Johnston. *Disney animation: The illusion of life*. Disney Editions, 1981.
- [10] J. Hwangbo, J. Lee, A. Dosovitskiy, D. Bellicoso, V. Tsounis, V. Koltun, and M. Hutter. Learning agile and dynamic motor skills for legged robots. *Science Robotics*, 4(26):eaau5872, 2019.
- [11] A. Kumar, Z. Fu, D. Pathak, and J. Malik. Rma: Rapid motor adaptation for legged robots. *Robotics: Science and Systems*, 2021.
- [12] X. B. Peng, Z. Ma, P. Abbeel, S. Levine, and A. Kanazawa. Amp: adversarial motion priors for stylized physics-based character control. *ACM Transactions on Graphics (ToG)*, 40(4), jul 2021. ISSN 0730-0301. doi:10.1145/3450626.3459670.
- [13] A. Vaswani, N. Shazeer, N. Parmar, J. Uszkoreit, L. Jones, A. N. Gomez, Ł. Kaiser, and I. Polosukhin. Attention is all you need. *Advances in neural information processing systems*, 30, 2017.
- [14] J. Tan, T. Zhang, E. Coumans, A. Iscen, Y. Bai, D. Hafner, S. Bohez, and V. Vanhoucke. Sim-to-real: Learning agile locomotion for quadruped robots. *arXiv preprint arXiv:1804.10332*, 2018.
- [15] J. Hwangbo, J. Lee, A. Dosovitskiy, D. Bellicoso, V. Tsounis, V. Koltun, and M. Hutter. Learning agile and dynamic motor skills for legged robots. *Science Robotics*, 4(26):eaau5872, 2019.
- [16] A. Agarwal, A. Kumar, J. Malik, and D. Pathak. Legged locomotion in challenging terrains using egocentric vision. In K. Liu, D. Kulic, and J. Ichnowski, editors, *Proceedings of The 6th Conference on Robot Learning*, volume 205 of *Proceedings of Machine Learning Research*, pages 403–415. PMLR, 14–18 Dec 2023.
- [17] G. B. Margolis and P. Agrawal. Walk these ways: Tuning robot control for generalization with multiplicity of behavior. In *Conference on Robot Learning*, pages 22–31. PMLR, 2023.



- [18] J. Cheng, M. Vlastelica, P. Koley, C. Li, and G. Martius. Learning diverse skills for local navigation under multi-constraint optimality. *arXiv preprint arXiv:2310.02440*, 2023.
- [19] T. Miki, J. Lee, L. Wellhausen, and M. Hutter. Learning to walk in confined spaces using 3d representation. *arXiv preprint arXiv:2403.00187*, 2024.
- [20] P. Arm, M. Mittal, H. Kolvenbach, and M. Hutter. Pedipulate: Enabling manipulation skills using a quadruped robot’s leg. *arXiv preprint arXiv:2402.10837*, 2024.
- [21] J. Truong, D. Yarats, T. Li, F. Meier, S. Chernova, D. Batra, and A. Rai. Learning navigation skills for legged robots with learned robot embeddings. In *2021 IEEE/RSJ International Conference on Intelligent Robots and Systems (IROS)*, pages 484–491. IEEE, 2021.
- [22] J. Lee, M. Bjelonic, A. Reske, L. Wellhausen, T. Miki, and M. Hutter. Learning robust autonomous navigation and locomotion for wheeled-legged robots. *Science Robotics*, 9(89): eadi9641, 2024.
- [23] X. Cheng, K. Shi, A. Agarwal, and D. Pathak. Extreme parkour with legged robots. *arXiv preprint arXiv:2309.14341*, 2023.
- [24] D. Holden, T. Komura, and J. Saito. Phase-functioned neural networks for character control. *ACM Transactions on Graphics (TOG)*, 36(4):1–13, 2017.
- [25] H. Zhang, S. Starke, T. Komura, and J. Saito. Mode-adaptive neural networks for quadruped motion control. *ACM Transactions on Graphics (TOG)*, 37(4):1–11, 2018.
- [26] H. Y. Ling, F. Zinno, G. Cheng, and M. Van De Panne. Character controllers using motion vaes. *ACM Transactions on Graphics (TOG)*, 39(4):40–1, 2020.
- [27] G. Tevet, S. Raab, B. Gordon, Y. Shafir, D. Cohen-or, and A. H. Bermano. Human motion diffusion model. In *The Eleventh International Conference on Learning Representations*, 2023. URL <https://openreview.net/forum?id=SJ1kSy02jwu>.
- [28] F. G. Harvey, M. Yurick, D. Nowrouzezahrai, and C. Pal. Robust motion in-betweening. *ACM Transactions on Graphics (TOG)*, 39(4):60–1, 2020.
- [29] J. Qin, Y. Zheng, and K. Zhou. Motion in-betweening via two-stage transformers. *ACM Transactions on Graphics (TOG)*, 41(6):184–1, 2022.
- [30] P. Starke, S. Starke, T. Komura, and F. Steinicke. Motion in-betweening with phase manifolds. *Proc. ACM Comput. Graph. Interact. Tech.*, 6(3), aug 2023. doi:10.1145/3606921.
- [31] D. Kang, F. De Vincenti, N. C. Adami, and S. Coros. Animal motions on legged robots using nonlinear model predictive control. In *2022 IEEE/RSJ International Conference on Intelligent Robots and Systems (IROS)*, pages 11955–11962. IEEE, 2022.
- [32] D. Kang, S. Zimmermann, and S. Coros. Animal gaits on quadrupedal robots using motion matching and model-based control. In *2021 IEEE/RSJ International Conference on Intelligent Robots and Systems (IROS)*, pages 8500–8507. IEEE, 2021.
- [33] X. Huang, Y. Chi, R. Wang, Z. Li, X. B. Peng, S. Shao, B. Nikolic, and K. Sreenath. Diffuse-loco: Real-time legged locomotion control with diffusion from offline datasets. *arXiv preprint arXiv:2404.19264*, 2024.
- [34] I. Radosavovic, B. Zhang, B. Shi, J. Rajasegaran, S. Kamat, T. Darrell, K. Sreenath, and J. Malik. Humanoid locomotion as next token prediction. *arXiv preprint arXiv:2402.19469*, 2024.
- [35] X. B. Peng, P. Abbeel, S. Levine, and M. Van de Panne. Deepmimic: Example-guided deep reinforcement learning of physics-based character skills. *ACM Transactions On Graphics (TOG)*, 37(4):1–14, 2018.

- [36] K. Bergamin, S. Clavet, D. Holden, and J. R. Forbes. Drecon: data-driven responsive control of physics-based characters. *ACM Transactions on Graphics (TOG)*, 38(6):1–11, 2019.
- [37] X. B. Peng, Z. Ma, P. Abbeel, S. Levine, and A. Kanazawa. Amp: Adversarial motion priors for stylized physics-based character control. *ACM Transactions on Graphics (TOG)*, 40(4):1–20, 2021.
- [38] H. Yao, Z. Song, B. Chen, and L. Liu. Controlvae: Model-based learning of generative controllers for physics-based characters. *ACM Transactions on Graphics (TOG)*, 41(6):1–16, 2022.
- [39] A. Escontrela, X. B. Peng, W. Yu, T. Zhang, A. Iscen, K. Goldberg, and P. Abbeel. Adversarial motion priors make good substitutes for complex reward functions. In *2022 IEEE/RSJ International Conference on Intelligent Robots and Systems (IROS)*, pages 25–32. IEEE, 2022.
- [40] T. Li, Y. Zhang, C. Zhang, Q. Zhu, J. Sheng, W. Chi, C. Zhou, and L. Han. Learning terrain-adaptive locomotion with agile behaviors by imitating animals. In *2023 IEEE/RSJ International Conference on Intelligent Robots and Systems (IROS)*, pages 339–345. IEEE, 2023.
- [41] H. Shi, T. Li, Q. Zhu, J. Sheng, L. Han, and M. Q.-H. Meng. An efficient model-based approach on learning agile motor skills without reinforcement. *arXiv preprint arXiv:2403.01962*, 2024.
- [42] Q. Zhang, P. Cui, D. Yan, J. Sun, Y. Duan, A. Zhang, and R. Xu. Whole-body humanoid robot locomotion with human reference. *arXiv preprint arXiv:2402.18294*, 2024.
- [43] I. Goodfellow, J. Pouget-Abadie, M. Mirza, B. Xu, D. Warde-Farley, S. Ozair, A. Courville, and Y. Bengio. Generative adversarial networks. *Communications of the ACM*, 63(11):139–144, 2020.
- [44] H. Zhang, S. Starke, T. Komura, and J. Saito. Mode-adaptive neural networks for quadruped motion control. *ACM Transactions on Graphics (ToG)*, 37(4), jul 2018. ISSN 0730-0301. doi:10.1145/3197517.3201366.
- [45] J. Schulman, S. Levine, P. Abbeel, M. Jordan, and P. Moritz. Trust region policy optimization. In *International conference on machine learning*, pages 1889–1897. PMLR, 2015.
- [46] J. Schulman, F. Wolski, P. Dhariwal, A. Radford, and O. Klimov. Proximal policy optimization algorithms. *arXiv preprint arXiv:1707.06347*, 2017.
- [47] T. Haarnoja, A. Zhou, P. Abbeel, and S. Levine. Soft actor-critic: Off-policy maximum entropy deep reinforcement learning with a stochastic actor. In *International conference on machine learning*, pages 1861–1870. PMLR, 2018.
- [48] J. Martinez-Piazuelo, D. E. Ochoa, N. Quijano, and L. F. Giraldo. A multi-critic reinforcement learning method: An application to multi-tank water systems. *IEEE Access*, 8:173227–173238, 2020. doi:10.1109/ACCESS.2020.3025194.
- [49] S. Mysore, G. Cheng, Y. Zhao, K. Saenko, and M. Wu. Multi-critic actor learning: Teaching rl policies to act with style. In *International Conference on Learning Representations*, 2021.
- [50] P. Xu, X. Shang, V. Zordan, and I. Karamouzas. Composite motion learning with task control. *ACM Transactions on Graphics (TOG)*, 42(4), jul 2023. ISSN 0730-0301. doi:10.1145/3592447.
- [51] A. Vaswani, N. Shazeer, N. Parmar, J. Uszkoreit, L. Jones, A. N. Gomez, Ł. Kaiser, and I. Polosukhin. Attention is all you need. *Advances in neural information processing systems*, 30, 2017.

- 379 [52] H. Touvron, T. Lavril, G. Izacard, X. Martinet, M.-A. Lachaux, T. Lacroix, B. Rozière,  
380 N. Goyal, E. Hambro, F. Azhar, et al. Llama: Open and efficient foundation language models.  
381 *arXiv preprint arXiv:2302.13971*, 2023.
- 382 [53] A. Chowdhery, S. Narang, J. Devlin, M. Bosma, G. Mishra, A. Roberts, P. Barham, H. W.  
383 Chung, C. Sutton, S. Gehrmann, et al. Palm: Scaling language modeling with pathways.  
384 *Journal of Machine Learning Research*, 24(240):1–113, 2023.
- 385 [54] A. Brohan, N. Brown, J. Carbajal, Y. Chebotar, J. Dabis, C. Finn, K. Gopalakrishnan, K. Haus-  
386 man, A. Herzog, J. Hsu, et al. Rt-1: Robotics transformer for real-world control at scale. *arXiv*  
387 *preprint arXiv:2212.06817*, 2022.
- 388 [55] V. Makoviychuk, L. Wawrzyniak, Y. Guo, M. Lu, K. Storey, M. Macklin, D. Hoeller, N. Rudin,  
389 A. Allshire, A. Handa, et al. Isaac gym: High performance gpu-based physics simulation for  
390 robot learning. *arXiv preprint arXiv:2108.10470*, 2021.
- 391 [56] X. B. Peng, P. Abbeel, S. Levine, and M. Van de Panne. Deepmimic: Example-guided deep re-  
392 inforcement learning of physics-based character skills. *ACM Transactions on Graphics (TOG)*,  
393 37(4):1–14, 2018.
- 394 [57] Unitree Robotics. <https://www.unitree.com/en/go2>.
- 395 [58] D. Kang, J. Cheng, M. Zamora, F. Zargarbashi, and S. Coros. Rl+ model-based control: Using  
396 on-demand optimal control to learn versatile legged locomotion. *IEEE Robotics and Automa-*  
397 *tion Letters*, 2023.

## A Appendix

### A.1 Observation and Action Space

The observation of the policy is composed of two main components: state observation and goal observation. State observation at time  $t$  include the linear velocity ( $\mathbf{v}$ ) and angular velocity ( $\boldsymbol{\omega}$ ) of the base in local coordinates, current joint angles ( $\boldsymbol{\theta}_j$ ), current joint velocities ( $\dot{\boldsymbol{\theta}}_j$ ), projected gravity in the base frame ( $\mathbf{g}_{proj}$ ), base height ( $h$ ) and previous actions ( $\mathbf{a}_{prev}$ ),

$$\mathbf{s}_t = \{\mathbf{v}, \boldsymbol{\omega}, \boldsymbol{\theta}_j, \dot{\boldsymbol{\theta}}_j, \mathbf{g}_{proj}, h, \mathbf{a}_{prev}\}_t. \quad (6)$$

A variable number of keyframes  $\mathbf{K} = (\mathbf{k}^1, \mathbf{k}^2, \dots, \mathbf{k}^{n_k})$  are specified as targets for the robot. At each time step  $t$ , each keyframe  $\mathbf{k}^i$  is transformed spatially and temporally into a robot-centric view. Then, the goal observation is prepared by calculating the remaining time to goal  $\hat{t}^i - t$  and the error to target goals ( $\Delta \mathbf{g}_t^i$ ),

$$\Delta \mathbf{g}_t^i \subset \{\Delta \mathbf{p}_b^i, \Delta \phi^i, \Delta \zeta^i, \Delta \psi^i, \Delta \boldsymbol{\theta}_j^i\}. \quad (7)$$

Here,  $\Delta \mathbf{p}_b^i$  denotes the error between robot base position and keyframe position in the base coordinate frame,  $\Delta \boldsymbol{\theta}_j^i$  is the error in joint angles, and  $\Delta \phi^i$ ,  $\Delta \zeta^i$  and  $\Delta \psi^i$  denote the errors in roll, pitch and yaw angles, respectively, which are wrapped to  $(-\pi, \pi]$ .

The policy receives the sequence of tokens  $\mathbf{X}_t = (\mathbf{x}_t^0, \dots, \mathbf{x}_t^{n_k})$  as input to the encoder, where  $\mathbf{x}_t^0 = (\mathbf{s}_t, \mathbf{0}, 0)$ , and  $\mathbf{x}_t^i = (\mathbf{s}_t, \Delta \mathbf{g}_t^i, \hat{t}^i - t)$  for  $i = 1, \dots, n_k$ . Thanks to the transformer-based keyframe encoding, the extra tokens can be masked to enable arbitrary number of goals. In addition, keyframes with a time over one second past the current time are also masked to avoid any long-term influence on reaching the future goals.

The action ( $\mathbf{a}_t$ ) space of the policy is set to target joint angles, which are tracked using a PD controller to compute the motor torques.

### A.2 Reward Terms

We include three groups of rewards in this framework: regularization, style, and goal. For each reward group, the final reward is computed as a multiplication of individual reward terms,

$$r_{\text{group}} = \prod_{i \in \text{group}} r_i. \quad (8)$$

Regularization rewards are designed to provide a smooth output of the policy and consist of several terms defined in Table A1. Here,  $\mathcal{K}$  is an exponential kernel function defined in Eq. 9 where  $\sigma$  and  $\delta$  are the sensitivity and tolerance of the kernel function, respectively.

$$\mathcal{K}(\mathbf{x}, \sigma, \delta) = \exp \left( - \left( \frac{\max(0, \|\mathbf{x}\| - \delta)}{\sigma} \right)^2 \right) \quad (9)$$

To generate natural motion between the keyframes, we use AMP proposed by Peng et al. [12], which involves training a discriminator  $\mathcal{D}$  to identify motions that are similar to those of the offline expert

Table A1: Regularization Reward Terms

|                              |                                                                                                                                     |
|------------------------------|-------------------------------------------------------------------------------------------------------------------------------------|
| Action rate                  | $\mathcal{K}(\dot{\mathbf{a}}, 8.0, 0)$                                                                                             |
| Base horizontal acceleration | $\mathcal{K}(\ddot{\mathbf{p}}_{xy}, 8.0, 0)$                                                                                       |
| Joint acceleration           | $\mathcal{K}(\ddot{\boldsymbol{\theta}}_j, 150.0, 10.0)$                                                                            |
| Joint soft limits            | $\mathcal{K}(\max(\boldsymbol{\theta}_j - \boldsymbol{\theta}_{j,min}, \boldsymbol{\theta}_{j,max} - \boldsymbol{\theta}), 0.1, 0)$ |

dataset. The style reward is defined based on the discriminator output of the latest state transition of the robot ( $\mathbf{s}_{t-1}, \mathbf{s}_t$ ),

$$r_{\text{style}} = \max(1 - 0.25(\mathcal{D}(\mathbf{s}_{t-1}, \mathbf{s}_t) - 1)^2, 0). \quad (10)$$

Goal rewards are defined with a temporally sparse kernel  $\Phi^i(x)$

$$\Phi^i(x) = \begin{cases} x, & t = \hat{t}^i \\ 0, & \text{otherwise} \end{cases}, \quad (11)$$

and only activated when the corresponding timestep for that goal  $\hat{t}^i$  is reached in the episode. The detailed reward terms are defined in table A2.

Table A2: Goal Reward Terms

|               |                                                                                          |
|---------------|------------------------------------------------------------------------------------------|
| Goal position | $\Phi^i(\mathcal{K}(\mathbf{p} - \hat{\mathbf{p}}^i, 0.2, 0))$                           |
| Goal roll     | $\Phi^i(\mathcal{K}(\phi - \hat{\phi}^i, 0.1, 0))$                                       |
| Goal pitch    | $\Phi^i(\mathcal{K}(\zeta - \hat{\zeta}^i, 0.1, 0))$                                     |
| Goal yaw      | $\Phi^i(\mathcal{K}(\psi - \hat{\psi}^i, 0.3, 0))$                                       |
| Goal posture  | $\Phi^i(\mathcal{K}(\ \boldsymbol{\theta}_j - \hat{\boldsymbol{\theta}}_j^i\ , 0.2, 0))$ |

### A.3 Dataset Preparation

We use a database of motion capture from dogs introduced by Zhang et al. [44]. The motions are retargeted to the robot skeleton using inverse kinematics for the end-effectors' positions with some local offsets to compensate for the different proportions of the robot and dog. A subset of around 20 minutes of data was used, removing the undesired motions such as smelling the ground, walking on slopes, etc. We augment this dataset with other motion clips animated by artists to include more diversity in the dataset. The frame rate is adjusted to that of the simulation, i.e. 50 frames per second.

### A.4 Training Procedure

We utilize Isaac Gym [55] for simulating the physical environment. At the start of each episode, the robot is either set to a default state or initialized according to a posture and height sampled from the dataset with Reference State Initialization (RSI). RSI plays a crucial role in capturing and learning the specific style of motion, as highlighted in previous studies such as Peng et al. [56]. Keyframes are derived either randomly or directly from a reference data trajectory. Our methodology incorporates a learning curriculum, beginning with keyframes entirely sourced from reference data and progressively increasing the proportion of randomly generated keyframes. To generate random keyframes, we start by selecting a time interval for each goal within a predetermined range. Subsequently, the distance and direction of the target position relative to the previous goal (or the initial position for the first goal) are sampled based on a specified range. The yaw angle is also chosen from a set range and adjusted relative to the previous goal. The robot's full posture is sampled from the dataset to ensure the target posture is feasible. The roll, pitch, and height of the keyframe are aligned with the corresponding attributes of the target posture frame.

The meticulous sampling of target keyframes is critical for ensuring their feasibility and preventing them from impeding effective policy learning. We train the policy to handle a maximum number of keyframes, randomly selecting the actual number of keyframes for each episode. To avoid negative impacts on training, unused goals are masked when input into the transformer encoder. For stability, the episode does not terminate immediately after the last goal is reached; instead, it terminates approximately one second later. The training setup for a full keyframe comprising time, position,



roll, pitch, yaw, and posture targets with up to 5 maximum keyframes requires approximately 17 hours on a system equipped with Nvidia GeForce RTX 4090.

## A.5 Hardware Implementation Details

Domain randomization is added during training to achieve a robust policy that can be executed on hardware. Similar to Kang et al. [58], we randomize friction coefficients, motor stiffness and damping gains and actuator latency. Furthermore, we add external pushes during training. Although joint limits are softly taken into account in the simulation, we found it crucial to terminate episodes when reaching joint limits to ensure a stable deployment on hardware. We use a motion capture system to receive the global position and orientation of the robot. These are used to compute the relative errors to the target goals and are then passed to the policy. Other observations are computed based on the outputs from the state estimator.

## A.6 Future goal anticipation

Details of target keyframes used for Table 1 are given in Table A3.

Table A3: Details of Keyframe Scenarios

| Scenario    | First Goal   |                | Second Goal  |                  |
|-------------|--------------|----------------|--------------|------------------|
|             | Time (steps) | Position (m)   | Time (steps) | Position (m)     |
| Straight    | 50           | (0, 0.32, 1.0) | 75           | (0, 0.32, 2.0)   |
| Turn        | 50           | (0, 0.32, 1.0) | 75           | (1.0, 0.32, 1.5) |
| Turn (Slow) | 50           | (0, 0.32, 1.0) | 100          | (1.0, 0.32, 1.5) |

## A.7 Training Hyperparameters

Table A4 provides details of hyperparameters used for training.

Table A4: Summary of Training Hyperparameters

|                                     |            |
|-------------------------------------|------------|
| Number of environments              | 4096       |
| Number of mini-batches              | 4          |
| Number of learning epochs           | 5          |
| Learning rate                       | 0.0001     |
| Entropy coefficient                 | 0.02       |
| Target KL divergence                | 0.02       |
| Gamma                               | 0.99       |
| Lambda                              | 0.95       |
| Discriminator learning rate         | 0.0003     |
| Transformer encoder layers          | 2          |
| Transformer heads                   | 1          |
| Transformer feed-forward dimensions | 512        |
| MLP dimensions                      | [512, 256] |
| Initial standard deviation          | 1.0        |
| Activation function                 | ELU        |
